# Supplementary material for: Diversity in root growth responses to moisture deficit in young faba bean (Vicia faba L.) plants
Source: PeerJ. 2018 Feb 21;6:e4401. doi: 10.7717/peerj.4401 (PMC5826991; doi:10.7717/peerj.4401)
Supplement: Table S4 — Raw data. [file peerj-06-4401-s004.xlsx]

## Sheet: Raw data
	Raw data germplasm survey of 89 faba bean accessions
Replication	Accession	Stomatal Conductance mmol H2O/m2/s	Canopy Temperature (°C)	SPAD Value	Shoot Dry Weight	Root Dry Weight	Root to Shoot Dry Weight Ratio	Root Mass Fraction
1	DS11202	89.9252	25.9	31.5	1.88	1	0.531915	0.347222
1	DS11207	104.29	20.1	36	2.64	1.94	0.734848	0.423581
1	DS11210	78.7655	22	42.7	2.6	1.44	0.553846	0.356436
1	DS11236	81.0277	22.3	39.2	2.72	1.3	0.477941	0.323383
1	DS11281	84.6598	22.3	35.4	1.76	1.52	0.863636	0.463415
1	DS11286	112.658	21	34	1.96	1.68	0.857143	0.461538
1	DS11294	125.582	23.5	32.2	0.82	0.52	0.634146	0.38806
1	WS11309	99.3285	22.8	37.6	1.44	0.62	0.430556	0.300971
1	WS11313	139.751	22.4	25.9	0.72	0.3	0.416667	0.294118
1	DS11317	87.9526	23	36.8	2.12	0.74	0.349057	0.258741
1	WS11344	160.97	21.1	36.7	1.45	0.98	0.675862	0.403292
1	DS11437	183.853	20.7	34.2	1.88	0.97	0.514184	0.339578
1	DS11480	94.223	22.1	45.1	1.7	1.04	0.611765	0.379562
1	DS11561	98.5573	21.4	47.1	1.64	0.98	0.597561	0.374046
1	DS11591	85.9032	21.8	39.7	1.24	0.84	0.677419	0.403846
1	WS11688	93.7702	23.1	29.2	0.34	0.36	1.05882	0.514286
1	DS11689	100.917	22.2	37.7	0.8	0.44	0.55	0.354839
1	DS11701	140.352	24.3	36.7	0.48	0.46	0.958333	0.489362
1	DS11788	115.204	22.1	33.4	1.32	0.56	0.424242	0.297872
1	DS11909	112.305	21.9	32.5	1.36	0.9	0.661765	0.39823
1	DS12257	101.188	21.4	42.7	1.7	1.02	0.6	0.375
1	WS12315	93.1011	22.2	29.9	0.86	0.4	0.465116	0.31746
1	WS13039	144.736	21.3	31.1	0.2	0.26	1.3	0.565217
1	DS13042	70.6487	24	33.7	0.06	0.22	3.66667	0.785714
1	WS13107	76.385	23.7	47	1.96	0.76	0.387755	0.279412
1	WS13185	215.123	21.8	43.2	1.58	1.04	0.658228	0.396947
1	DS13463	129.908	22.6	36.3	2	0.78	0.39	0.280576
1	DS13473	105.178	25.2	35.3	1.54	1.3	0.844156	0.457746
1	DS13481	97.8007	23.2	37.2	1.6	0.8	0.5	0.333333
1	DS13918	98.5573	22.1	42.3	1.7	0.82	0.482353	0.325397
1	DS70622	110.582	21.8	39.4	2.76	1.22	0.442029	0.306533
1	DS72271	122.887	24.7	30.2	0.76	0.34	0.447368	0.309091
1	DS72309	72.8328	20.9	38.1	1.3	0.74	0.569231	0.362745
1	DS72310	111.955	23	33.3	1.04	0.58	0.557692	0.358025
1	DS72366	93.3228	21.8	45.3	2.3	1.02	0.443478	0.307229
1	DS72387	56.7815	24.4	45.3	0.06	0.08	1.33333	0.571429
1	DS72396	105.478	23.3	34.1	0.28	0.24	0.857143	0.461538
1	DS72455	188.18	22.3	39.8	2.54	0.8	0.314961	0.239521
1	DS72493	87.9526	20.1	40.5	1.6	0.74	0.4625	0.316239
1	DS72523	120.745	22.5	38.2	1.02	0.38	0.372549	0.271429
1	DS74370	127.941	22.8	40.2	1.94	0.82	0.42268	0.297101
1	DS74554	80.2556	22.2	39	2.62	0.8	0.305344	0.233918
1	DS74573	198.512	24.7	31.1	1.8	0.98	0.544444	0.352518
1	WS99379	163.532	20.9	38.1	1.98	0.84	0.424242	0.297872
1	WS99465	64.7135	21.5	31.5	1.58	0.82	0.518987	0.341667
1	WS99501	47.8923	25.1	34.8	0.66	0.04	0.0606061	0.0571429
1	DS99515	100.38	21.6	43.1	1.5	0.96	0.64	0.390244
1	DS112096	96.5711	23.5	37.8	0.6	0.34	0.566667	0.361702
1	WS114476	105.178	25.2	29.9	0.04	0.06	1.5	0.6
1	WS114576	63.0855	22.1	30.2	0.08	0.02	0.25	0.2
1	WS115134	86.0846	21.7	34.1	0.22	0.04	0.181818	0.153846
1	WS115177	104.584	21.4	33.4	0.32	0.22	0.6875	0.407407
1	WS115182	109.579	26.5	31.9	0.12	0.04	0.333333	0.25
1	WS115186	115.957	22.2	29.5	0.14	0.04	0.285714	0.222222
1	WS115352	82.3027	23.2	31.5	0.06	0.08	1.33333	0.571429
1	WS115430	129.409	21.4	31.2	0.36	0.12	0.333333	0.25
1	WS117830	79.952	23.2	36.1	1.44	0.62	0.430556	0.300971
1	WS117841	87.9526	25.1	27.8	1.8	0.64	0.355556	0.262295
1	WS117849	98.3035	24.7	27.8	2.4	1.04	0.433333	0.302326
1	WS117853	113.371	21.5	40.3	1.16	0.64	0.551724	0.355556
1	WS117855	144.736	22.5	36.2	2	0.86	0.43	0.300699
1	WS117857	82.1405	21.2	29.4	0.96	0.5	0.520833	0.342466
1	WS117864	83.6291	25.6	27.2	1.1	0.54	0.490909	0.329268
1	WS117868	99.3285	20.1	45.6	1.36	0.58	0.426471	0.298969
1	DS124062	190.644	23.2	32.7	1.98	0.92	0.464646	0.317241
1	DS124138	107.01	23.5	35.8	1.2	0.7	0.583333	0.368421
1	DS11320	746.844	21.2	25.8	2.65	1.3	0.491184	0.329392
1	WS124242	106.699	22.5	35.2	0.54	0.44	0.814815	0.44898
1	DS124353	86.0846	21.5	35.6	1.54	0.72	0.467532	0.318584
1	WS130600	70.7595	22.5	36.3	1.12	0.38	0.339286	0.253333
1	WS130731	88.7286	20.9	36.2	1.38	0.54	0.391304	0.28125
1	DS131708	72.8328	22.1	34.4	0.14	0.08	0.571429	0.363636
1	WS132238	142.191	22	30.6	1.38	0.52	0.376812	0.273684
1	WS132258	104.29	25.3	32	1.52	0.8	0.526316	0.344828
1	WS132266	67.516	22.6	37.8	1.18	0.48	0.40678	0.289157
1	WS132274	68.2152	22.2	31.3	2.12	0.68	0.320755	0.242857
1	DS137675	98.8127	21.1	33.8	0.74	0.4	0.540541	0.350877
1	Aurora	127.941	21.1	35.1	0.88	0.64	0.727273	0.421053
1	Babylon	76.52	21.8	37.6	0.66	0.38	0.575758	0.365385
1	DOSHA	113.732	21.4	39.8	1.56	0.52	0.333333	0.25
1	EH 06006-6	71.2073	22.8	44.5	2.6	0.96	0.369231	0.269663
1	Gebelcho	98.0513	22.1	31.8	1.36	0.48	0.352941	0.26087
1	GLA 1103	109.579	21.4	38	0.72	0.42	0.583333	0.368421
1	Kassa	51.826	22.8	27	0.16	0.08	0.5	0.333333
1	Messay	73.4365	23.1	34.8	1.66	0.64	0.385542	0.278261
1	NC 58	80.1034	26.9	31.5	1.64	0.66	0.402439	0.286957
1	Tesfa	82.9592	20.2	33.8	0.86	0.44	0.511628	0.338462
1	ILB93.8/2	107.01	21.4	39.1	1.6	0.56	0.35	0.259259
1	Melodie/2	86.4503	26.3	40.4	0.56	0.3	0.535714	0.348837
2	DS11202	238.266	23.9	30	3.24	0.86	0.265432	0.209756
2	DS11207	336.074	20.6	33.7	2.08	0.76	0.365385	0.267606
2	DS11210	99.5121	22.3	34.1	2.38	1.14	0.478992	0.323864
2	DS11236	722.149	22.5	31.9	3.28	1.56	0.47561	0.322314
2	DS11281	676.997	22.9	33.5	3.18	1.14	0.358491	0.263889
2	DS11286	216.104	23.1	29.9	2.54	1	0.393701	0.282486
2	DS11294	183.447	19.7	33.2	1.54	0.64	0.415584	0.293578
2	WS11309	217.768	20.7	28.2	1.98	0.82	0.414141	0.292857
2	WS11313	656.611	20.1	30	1.78	0.66	0.370787	0.270492
2	DS11317	676.997	23.5	29.6	2.7	1.1	0.407407	0.289474
2	WS11344	266.492	19.7	39.5	1.86	1	0.537634	0.34965
2	DS11437	122.656	21.4	35.8	2.68	1.26	0.470149	0.319797
2	DS11480	774.274	21.1	33.9	2.38	0.68	0.285714	0.222222
2	DS11561	323.077	20.8	36.1	2.46	1.04	0.422764	0.297143
2	DS11591	637.501	21.5	27	2.44	0.94	0.385246	0.278107
2	WS11688	676.997	18.5	30.9	0.98	0.34	0.346939	0.257576
2	DS11689	457.129	20.9	38.5	1.34	0.46	0.343284	0.255556
2	DS11701	519.014	22.2	35.2	0.86	0.34	0.395349	0.283333
2	DS11788	543.966	20.4	36.8	2.24	0.72	0.321429	0.243243
2	DS11909	424.078	21.4	26.1	2.5	0.64	0.256	0.203822
2	DS12257	269.199	21.8	34.6	2.48	1.1	0.443548	0.307263
2	WS12315	293.358	20.5	28.3	0.44	0.2	0.454545	0.3125
2	WS13039	722.149	20.1	28.3	1.8	0.64	0.355556	0.262295
2	DS13042	457.129	23.7	33.9	2.46	0.88	0.357724	0.263473
2	WS13107	602.656	21.6	34	3.76	1.08	0.287234	0.22314
2	WS13185	531.171	21.1	35.5	1.46	1.16	0.794521	0.442748
2	DS13463	185.727	19.5	34	2.78	0.82	0.294964	0.227778
2	DS13473	519.014	21.9	35.1	3	1.18	0.393333	0.282297
2	DS13481	261.261	21	34.8	3.18	1.08	0.339623	0.253521
2	DS13918	637.501	21.6	36.8	1.82	0.6	0.32967	0.247934
2	DS70622	747.242	22.1	33	3.92	1.56	0.397959	0.284672
2	DS72271	203.782	22.5	32.6	2.66	0.66	0.24812	0.198795
2	DS72309	138.522	20.8	29.6	2.88	1	0.347222	0.257732
2	DS72310	189.275	23.2	28	2	0.52	0.26	0.206349
2	DS72366	656.611	20.1	42.1	3.16	0.96	0.303797	0.23301
2	DS72387	166.429	22.7	40.7	2.18	1.08	0.495413	0.331288
2	DS72396	722.149	22.5	31.3	0.54	0.18	0.333333	0.25
2	DS72455	300.196	23	37.8	3.1	1.12	0.36129	0.265403
2	DS72493	350.308	20.9	41.1	2.64	1.38	0.522727	0.343284
2	DS72523	139.099	21.5	37.5	0.34	0.3	0.882353	0.46875
2	DS74370	221.188	18.7	37.7	2.1	0.72	0.342857	0.255319
2	DS74554	698.792	22.2	37.8	2.54	1	0.393701	0.282486
2	DS74573	219.462	22	31.7	4.34	1.94	0.447005	0.308917
2	WS99379	345.415	21.1	34.9	2.66	1.12	0.421053	0.296296
2	WS99465	219.462	21.2	30.1	2.3	0.78	0.33913	0.253247
2	WS99501	543.966	22.1	33.3	1.02	0.52	0.509804	0.337662
2	DS99515	571.683	21	34.4	2.36	1.26	0.533898	0.348066
2	DS112096	181.232	20.5	31.8	2.14	0.92	0.429907	0.300654
2	WS114476	318.992	23.2	31.4	0.12	0.08	0.666667	0.4
2	WS114576	602.656	21.5	27.1	0.38	0.18	0.473684	0.321429
2	WS115134	230.311	23.5	33.7	0.56	0.22	0.392857	0.282051
2	WS115177	234.21	19	26.5	1.08	0.44	0.407407	0.289474
2	WS115182	448.343	19.4	27.8	0.48	0.16	0.333333	0.25
2	WS115186	722.149	18	27.6	0.42	0.1	0.238095	0.192308
2	WS115352	698.792	24.6	25.3	0.5	0.08	0.16	0.137931
2	WS115430	774.274	18.5	34.7	0.86	0.28	0.325581	0.245614
2	WS117830	345.415	22.5	35.1	2.08	0.66	0.317308	0.240876
2	WS117841	747.242	24.6	29.1	1.18	0.5	0.423729	0.297619
2	WS117849	230.311	19.5	19.5	3.14	1	0.318471	0.241546
2	WS117853	747.242	21.2	28.4	2.46	1.1	0.447154	0.308989
2	WS117855	457.129	19.9	25.3	2.76	0.86	0.311594	0.237569
2	WS117857	277.711	23.5	25.4	1.96	0.68	0.346939	0.257576
2	WS117864	206.707	25.5	27.8	2.56	0.92	0.359375	0.264368
2	WS117868	195.559	20.7	30.8	2.76	0.84	0.304348	0.233333
2	DS124062	266.492	21.1	27.1	1.66	0.6	0.361446	0.265487
2	DS124138	619.55	18.6	34.9	1	0.34	0.34	0.253731
2	DS11320	803.481	19.4	25.5	2.3	1.18	0.513043	0.33908
2	WS124242	112.631	18.7	39.5	2.38	1.28	0.537815	0.349727
2	DS124353	466.303	23	29.2	1.96	0.62	0.316327	0.24031
2	WS130600	365.969	20.3	33.8	2.38	0.76	0.319328	0.242038
2	WS130731	307.407	19.4	31.6	1.76	0.64	0.363636	0.266667
2	DS131708	290.069	21.6	33.5	1	0.38	0.38	0.275362
2	WS132238	395.885	24.2	24.2	1.64	0.68	0.414634	0.293103
2	WS132258	496.431	20.9	29.1	1.82	0.72	0.395604	0.283465
2	WS132266	189.275	20.8	32.3	2.16	0.8	0.37037	0.27027
2	WS132274	722.149	22.6	23.3	2.52	0.9	0.357143	0.263158
2	DS137675	803.481	23.2	31.3	1.44	0.4	0.277778	0.217391
2	Aurora	383.285	19.6	34.2	1.54	0.78	0.506494	0.336207
2	Babylon	409.445	19	35	1.42	0.72	0.507042	0.336449
2	DOSHA	350.308	21.3	33.2	1.54	0.5	0.324675	0.245098
2	EH 06006-6	179.079	26.1	30.5	4.14	0.96	0.231884	0.188235
2	Gebelcho	457.129	28.6	32.9	2.34	0.88	0.376068	0.273292
2	GLA 1103	212.862	23.4	37.9	1.3	0.52	0.4	0.285714
2	Kassa	188.075	20.6	30.7	1.74	0.62	0.356322	0.262712
2	Messay	196.876	20.9	36.1	2.54	1.02	0.401575	0.286517
2	NC 58	300.196	23.5	36.8	2.4	0.8	0.333333	0.25
2	Tesfa	340.672	19.3	33.4	1.8	0.56	0.311111	0.237288
2	ILB93.8/2	448.343	20.3	36.2	2.06	0.68	0.330097	0.248175
2	Melodie/2	165.543	23.8	37.2	0.6	0.28	0.466667	0.318182
3	DS11202	124.819	24.4	29.1	2.63	0.9	0.34264	0.255198
3	DS11207	490.401	21.8	33.1	3.54	1.2	0.338983	0.253165
3	DS11210	668.774	22.2	43.2	3.64	1.66	0.456044	0.313208
3	DS11236	668.774	22.4	33.1	3.02	1.32	0.437086	0.304147
3	DS11281	738.166	22.4	30.1	1.78	0.68	0.382022	0.276423
3	DS11286	668.774	22.8	36.6	4.16	1.4	0.336538	0.251799
3	DS11294	793.722	22.4	34.2	2.92	1.36	0.465753	0.317757
3	WS11309	595.336	22.9	35	2.7	1.38	0.511111	0.338235
3	WS11313	202.74	22.1	35.7	2.76	0.8	0.289855	0.224719
3	DS11317	397.649	21.8	34.1	3.68	1.42	0.38587	0.278431
3	WS11344	668.774	22.5	34.7	1.7	1.02	0.6	0.375
3	DS11437	512.71	21.7	32.6	1.32	0.74	0.560606	0.359223
3	DS11480	579.601	22.2	31.6	1.86	0.48	0.258065	0.205128
3	DS11561	524.719	22.9	27.6	2.58	0.88	0.341085	0.254335
3	DS11591	537.359	22.2	27.7	1.52	1.04	0.684211	0.40625
3	WS11688	595.336	21.9	30.1	1.42	0.56	0.394366	0.282828
3	DS11689	668.774	21.9	39.7	1.66	0.66	0.39759	0.284483
3	DS11701	564.739	22	34.7	0.86	0.46	0.534884	0.348485
3	DS11788	690.305	21.7	33	2.18	1.08	0.495413	0.331288
3	DS11909	595.336	21.8	31.9	3.04	1.08	0.355263	0.262136
3	DS12257	612.025	22.3	40.6	2.1	1.18	0.561905	0.359756
3	WS12315	418.927	23	28	0.68	0.5	0.735294	0.423729
3	WS13039	690.305	21.8	27.2	0.6	0.46	0.766667	0.433962
3	DS13042	738.166	22.5	36.3	2	0.96	0.48	0.324324
3	WS13107	315.118	23.5	31.3	4.36	1.6	0.366972	0.268456
3	WS13185	629.758	23	32.5	2.28	1.24	0.54386	0.352273
3	DS13463	151.125	20.9	33.4	2.26	0.89	0.39528	0.283298
3	DS13473	668.774	21.6	32.8	2.74	1.26	0.459854	0.315
3	DS13481	280.291	22.2	31.2	1.96	0.98	0.5	0.333333
3	DS13918	537.359	22.7	34.6	2.44	0.9	0.368852	0.269461
3	DS70622	260.642	22.2	32.1	3.74	1.88	0.502674	0.33452
3	DS72271	537.359	22.8	30.6	1.92	0.76	0.395833	0.283582
3	DS72309	612.025	22.3	34.6	3.44	1.38	0.401163	0.286307
3	DS72310	648.636	22.2	32.8	2.1	0.52	0.247619	0.198473
3	DS72366	397.649	22.9	41.9	2.84	0.94	0.330986	0.248677
3	DS72387	434.577	21.8	34.1	2	0.76	0.38	0.275362
3	DS72396	648.636	22	36.9	0.62	0.44	0.709677	0.415094
3	DS72455	451.577	21.2	36.2	3.8	1.42	0.373684	0.272031
3	DS72493	648.636	20.9	43.5	1.18	0.58	0.491525	0.329545
3	DS72523	303.673	22.6	34.7	2.9	0.86	0.296552	0.228723
3	DS74370	629.758	23.9	37.9	2.78	0.9	0.323741	0.244565
3	DS74554	442.897	23.9	33.2	0.86	0.22	0.255814	0.203704
3	DS74573	629.758	21.6	28.5	3.8	1.42	0.373684	0.272031
3	WS99379	216.797	22.1	36.3	2.43	1.03	0.423077	0.297297
3	WS99465	404.472	21.5	27.7	2.6	0.9	0.346154	0.257143
3	WS99501	738.166	23.2	31.4	1.98	0.88	0.444444	0.307692
3	DS99515	690.305	22.2	35.5	1.86	1.22	0.655914	0.396104
3	DS112096	426.594	21.2	30.2	2.06	0.92	0.446602	0.308725
3	WS114476	411.559	22.6	29.6	0.58	0.44	0.758621	0.431373
3	WS114576	612.025	22.3	28.5	0.82	0.3	0.365854	0.267857
3	WS115134	668.774	20.9	33.2	0.48	0.28	0.583333	0.368421
3	WS115177	564.739	21.7	28.1	0.66	0.36	0.545455	0.352941
3	WS115182	648.636	21.2	27.6	0.32	0.22	0.6875	0.407407
3	WS115186	668.774	21.6	26.6	0.72	0.32	0.444444	0.307692
3	WS115352	612.025	21.5	28.9	0.54	0.28	0.518519	0.341463
3	WS115430	595.336	22.5	27.5	0.66	0.32	0.484848	0.326531
3	WS117830	629.758	22.2	23.4	2.58	0.84	0.325581	0.245614
3	WS117841	793.722	21.6	25.1	2.58	0.9	0.348837	0.258621
3	WS117849	793.722	22.8	16.9	3.32	0.8	0.240964	0.194175
3	WS117853	564.739	21.8	28.3	2.68	1.16	0.432836	0.302083
3	WS117855	404.472	22.4	24.9	2.64	1.14	0.431818	0.301587
3	WS117857	690.305	22.8	25.3	3.16	1.08	0.341772	0.254717
3	WS117864	220.237	21.7	26.1	2.76	1.16	0.42029	0.295918
3	WS117868	460.639	20.8	26.1	3.86	1.26	0.326425	0.246094
3	DS124062	595.336	22.1	24.9	2.92	1.1	0.376712	0.273632
3	DS124138	579.601	22	34.8	1.76	0.8	0.454545	0.3125
3	DS11320	764.87	21.8	25.4	3.62	1.3	0.359116	0.264228
3	WS124242	108.923	21.3	38	1.61	0.96	0.59751	0.374026
3	DS124353	579.601	23.8	35	2.04	0.98	0.480392	0.324503
3	WS130600	629.758	22.8	33.5	3.2	1.04	0.325	0.245283
3	WS130731	690.305	21.9	32.1	2.78	0.88	0.316547	0.240437
3	DS131708	132.471	23.1	35	0.02	0.04	2	0.666667
3	WS132238	361.524	22.1	31.6	3.22	1.12	0.347826	0.258065
3	WS132258	595.336	21	27.5	3.16	1.56	0.493671	0.330508
3	WS132266	764.87	22.3	32.5	2.72	0.94	0.345588	0.256831
3	WS132274	268.666	22.6	29.4	3.78	1.22	0.322751	0.244
3	DS137675	564.739	21.9	34.8	1.42	0.62	0.43662	0.303922
3	Aurora	595.336	21.5	34.2	1.32	1.1	0.833333	0.454545
3	Babylon	579.601	23.5	34.8	0.6	0.4	0.666667	0.4
3	DOSHA	793.722	21.6	26.2	2	0.68	0.34	0.253731
3	EH 06006-6	248.417	24.5	36.8	2.72	0.98	0.360294	0.264865
3	Gebelcho	690.305	23.2	35.5	2.84	0.82	0.288732	0.224044
3	GLA 1103	738.166	22.3	35.6	1.64	0.82	0.5	0.333333
3	Kassa	480.021	21.5	31.4	1.26	0.58	0.460317	0.315217
3	Messay	480.021	22.5	31.7	2.2	0.8	0.363636	0.266667
3	NC 58	612.025	21.5	34.2	2.12	0.76	0.358491	0.263889
3	Tesfa	411.559	22.2	32.8	2.34	0.9	0.384615	0.277778
3	ILB93.8/2	764.87	21.2	34.8	2.48	1.22	0.491935	0.32973
3	Melodie/2	612.025	22.3	39.6	1.2	0.74	0.616667	0.381443
4	DS11202	125.43	23.3	25.9	2.76	0.84	0.304348	0.233333
4	DS11207	191.809	22.5	30.1	0.86	0.4	0.465116	0.31746
4	DS11210	119.015	23.1	37.2	1.94	1	0.515464	0.340136
4	DS11236	175.904	23.2	40	1.22	0.58	0.47541	0.322222
4	DS11281	184.592	20.7	33	1.6	0.86	0.5375	0.349593
4	DS11286	197.002	21.6	34.7	2.96	1.8	0.608108	0.378151
4	DS11294	194.365	20.1	30.4	0.94	0.9	0.957447	0.48913
4	WS11309	179.047	21.1	34.2	2.14	1.36	0.635514	0.388571
4	WS11313	213.158	23.7	35.2	2.14	1.26	0.588785	0.370588
4	DS11317	181.217	23.5	32.5	1.32	1	0.757576	0.431034
4	WS11344	270.307	24.5	33.4	1.94	0.94	0.484536	0.326389
4	DS11437	184.592	19.1	34.3	1.64	0.9	0.54878	0.354331
4	DS11480	208.451	22.4	29.9	1.68	0.72	0.428571	0.3
4	DS11561	183.451	22.7	41.5	3.5	1.36	0.388571	0.279835
4	DS11591	179.047	23.8	29.5	0.82	0.52	0.634146	0.38806
4	WS11688	211.562	21.1	31.7	1.1	0.52	0.472727	0.320988
4	DS11689	214.783	25.7	39.1	1.1	0.7	0.636364	0.388889
4	DS11701	262.234	21.5	33.5	0.66	0.58	0.878788	0.467742
4	DS11788	243.169	21.8	31.3	0.82	0.72	0.878049	0.467532
4	DS11909	238.887	20.1	31.2	2.8	1.2	0.428571	0.3
4	DS12257	183.451	24	37.3	2.4	0.94	0.391667	0.281437
4	WS12315	169.052	23.2	23.9	1.54	0.88	0.571429	0.363636
4	WS13039	309.26	20.8	27.7	1.48	0.78	0.527027	0.345133
4	DS13042	151.807	23.5	30.5	1.28	0.74	0.578125	0.366337
4	WS13107	156.296	23.9	35.2	1.88	1.12	0.595745	0.373333
4	WS13185	400.079	22.5	31.4	1.78	1.36	0.764045	0.433121
4	DS13463	151.807	20.5	30	2	1.08	0.54	0.350649
4	DS13473	227.021	19.3	32	2.02	1.08	0.534653	0.348387
4	DS13481	162.802	18.1	34.5	3.32	1.26	0.379518	0.275109
4	DS13918	208.451	23.4	32.7	1.12	0.54	0.482143	0.325301
4	DS70622	202.537	20.5	26.7	3.54	1.7	0.480226	0.324427
4	DS72271	193.077	24.5	34.2	1.88	1.42	0.755319	0.430303
4	DS72309	125.43	19.4	28.3	2	0.8	0.4	0.285714
4	DS72310	191.809	22.5	33.5	1.6	0.64	0.4	0.285714
4	DS72366	183.451	23.5	31.5	2.48	1.26	0.508065	0.336898
4	DS72387	154.012	23.2	35.5	1	0.84	0.84	0.456522
4	DS72396	221.583	23	39	1.8	1.08	0.6	0.375
4	DS72455	273.127	24.6	31.6	3.04	0.86	0.282895	0.220513
4	DS72493	170.945	22.1	38.8	2.62	1.18	0.450382	0.310526
4	DS72523	156.296	23.6	35.1	1.74	0.94	0.54023	0.350746
4	DS74370	205.444	22.6	34.5	2.42	1.2	0.495868	0.331492
4	DS74554	162.802	21.4	31.2	2.6	0.96	0.369231	0.269663
4	DS74573	282.003	22	30.5	3.58	1.28	0.357542	0.263374
4	WS99379	218.121	24.2	35.9	2.64	1.12	0.424242	0.297872
4	WS99465	120.233	24.5	31.4	1.86	0.76	0.408602	0.290076
4	WS99501	99.6751	21.6	29.2	2.98	1.54	0.516779	0.340708
4	DS99515	214.783	23.4	36.5	1.92	1.32	0.6875	0.407407
4	DS112096	156.296	22.5	31.1	2.34	1.24	0.529915	0.346369
4	WS114476	186.926	24.6	27.4	0.32	0.42	1.3125	0.567568
4	WS114576	136.544	22.2	26.7	0.5	0.4	0.8	0.444444
4	WS115134	162.802	22.6	39.9	0.2	0.32	1.6	0.615385
4	WS115177	181.217	24.8	26	0.68	0.68	1	0.5
4	WS115182	230.822	21.2	26.6	0.52	0.42	0.807692	0.446809
4	WS115186	288.297	24.6	26.1	0.34	0.4	1.17647	0.540541
4	WS115352	184.592	22.2	28.3	0.62	0.4	0.645161	0.392157
4	WS115430	285.11	22	24.5	0.42	0.24	0.571429	0.363636
4	WS117830	165.412	20.1	22.9	2.22	0.64	0.288288	0.223776
4	WS117841	198.352	22.8	30.4	1.46	0.8	0.547945	0.353982
4	WS117849	186.926	21.7	32.1	3.38	1.08	0.319527	0.242152
4	WS117853	234.774	25.6	26.5	1.94	0.62	0.319588	0.242188
4	WS117855	249.935	23.2	25.4	2.3	0.62	0.269565	0.212329
4	WS117857	161.953	23.9	28.6	2.2	0.94	0.427273	0.299363
4	WS117864	134.888	20.9	29.2	2.66	1.38	0.518797	0.341584
4	WS117868	163.661	21.7	31.2	1.82	0.84	0.461538	0.315789
4	DS124062	321.103	24.5	29.5	0.1	0.24	2.4	0.705882
4	DS124138	219.836	20.4	35.9	0.96	0.64	0.666667	0.4
4	DS11320	694.522	22.3	26.4	2.02	1.42	0.70297	0.412791
4	WS124242	109.588	22.8	39.2	1.9	1.16	0.610526	0.379085
4	DS124353	171.91	20.3	32.9	1.48	0.64	0.432432	0.301887
4	WS130600	143.69	19.7	36.9	1	0.56	0.56	0.358974
4	WS130731	172.888	21.4	31.8	1.78	0.88	0.494382	0.330827
4	DS131708	115.533	22	37.3	0.94	0.96	1.02128	0.505263
4	WS132238	234.774	20.9	30.3	1.52	0.72	0.473684	0.321429
4	WS132258	221.583	25.2	27.1	2.24	1.22	0.544643	0.352601
4	WS132266	128.24	22.6	30.9	2.32	1.02	0.439655	0.305389
4	WS132274	133.281	20	27.7	2.12	0.84	0.396226	0.283784
4	DS137675	213.158	19.8	31.1	1.26	0.52	0.412698	0.292135
4	Aurora	232.779	23	35.1	1.6	1.26	0.7875	0.440559
4	Babylon	153.269	18.9	34.2	1.78	1.18	0.662921	0.398649
4	DOSHA	219.836	23.3	29.8	1.36	0.9	0.661765	0.39823
4	EH 06006-6	119.418	22.9	35.1	2.4	0.82	0.341667	0.254658
4	Gebelcho	195.673	25.2	34.6	2.36	1	0.423729	0.297619
4	GLA 1103	194.365	23.4	34.3	1.12	0.72	0.642857	0.391304
4	Kassa	98.1477	25.6	30.5	0.88	0.7	0.795455	0.443038
4	Messay	132.234	19.7	34.9	1.56	0.74	0.474359	0.321739
4	NC 58	154.012	24	28.3	2.4	1.38	0.575	0.365079
4	Tesfa	157.075	25.2	36.7	1.82	0.78	0.428571	0.3
4	ILB93.8/2	211.562	23.7	33.2	1.52	0.88	0.578947	0.366667
4	Melodie/2	144.97	20.9	37.7	0.6	0.2	0.333333	0.25
